# Supplementary material for: Apps: eerste keus ‘medicijn’ voor patiënten met diabetes mellitus type 2?
Source: Springer Nature journal article supplement (doi:10.1007/s12508-023-00417-7), 2023-11-09
Supplement: MOESM1 [file 26288070]

Bijlage A. Topiclist

|  | Voorstellen respondent | Zou u zich willen voorstellen? |
| --- | --- | --- |
|  | Personal Innovativeness Scale | 1. Ik loop meestal voor op de rest en heb vaak vernieuwende ideeën. Ik ben dan ook altijd de eerste die een nieuwe technologie gebruikt. (innovators)  2. Ik houd ervan om nieuwe dingen uit te proberen en ik experimenteer graag met nieuwe technologie. (Vroege gebruikers)  3. Ik gebruik een nieuwe technologie pas als ik weet dat dit handig en nuttig is. Ik zal het dan ook aan anderen aanbevelen. (Vroege meerderheid)  4. Ik gebruik een nieuwe technologie pas als veel mensen dit ook gebruiken en ik zie dat het handig en nuttig is om te gebruiken. (Late meerderheid)  5. Ik gebruik een nieuwe technologie niet snel, omdat ik graag blijf bij datgene wat ik al ken en gebruik. (Achterblijvers) |
|  | Enhanced TAM   1. Attitude 2. Barrières 3. Verwacht gebruiksgemak 4. Verwacht nut | Denkt u dat de behandeling van patiënten met DM2 verbeterd kan worden door mHealth?  Welke belemmeringen ervaart u om mHealth te adviseren bij patiënten met DM2?  Verwacht u dat u en uw patiënten goed met mHealth kunnen omgaan?  Verwacht u dat mHealth u, als professional, kan helpen in de zorg voor patiënten met DM2? |
|  | Technologiekwalificaties   1. Vinden 2. Vertellen & instrueren 3. Vertrouwen 4. Veilig & vaardig | In hoeverre weet u waar u het aanbod van mHealth kunt vinden?  Vindt u dat u voldoende kennis bezit om uw patiënten te vertellen en te instrueren over het gebruik van mHealth?  Vertrouwt u op de werking van mHealth?  Vindt u dat u veilig met mHealth kunt werken? |
|  | Faciliteren mHealth | Wat heeft u nodig om meer van mHealth gebruik te maken? |
