# Supplementary material for: Apps: eerste keus ‘medicijn’ voor patiënten met diabetes mellitus type 2?
Source: Springer Nature journal article supplement (doi:10.1007/s12508-023-00417-7), 2023-11-09
Supplement: MOESM2 [file 26288070]

Bijlage B. Codebomen


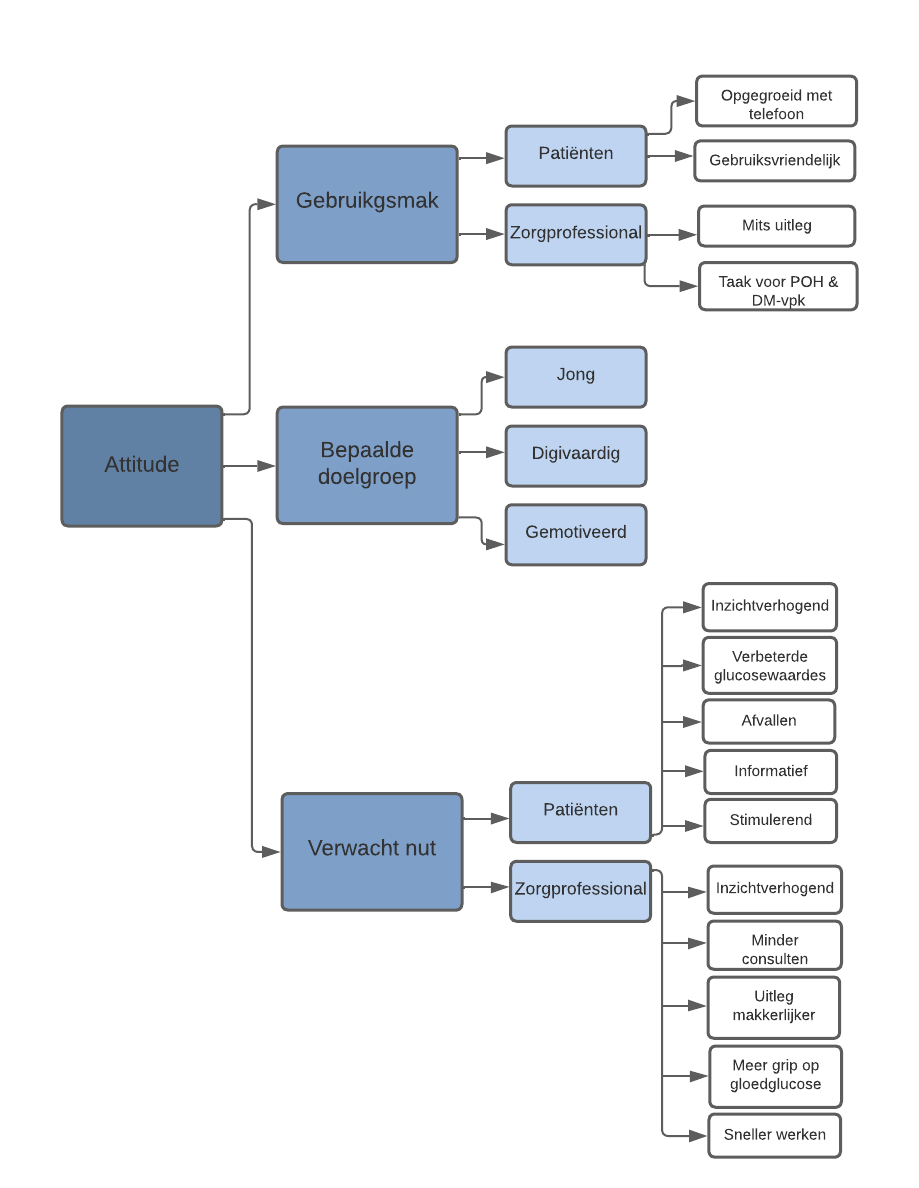


**Figuur 2**
*Codeboom barrières*

**Figuur 1**
*Codeboom attitude*


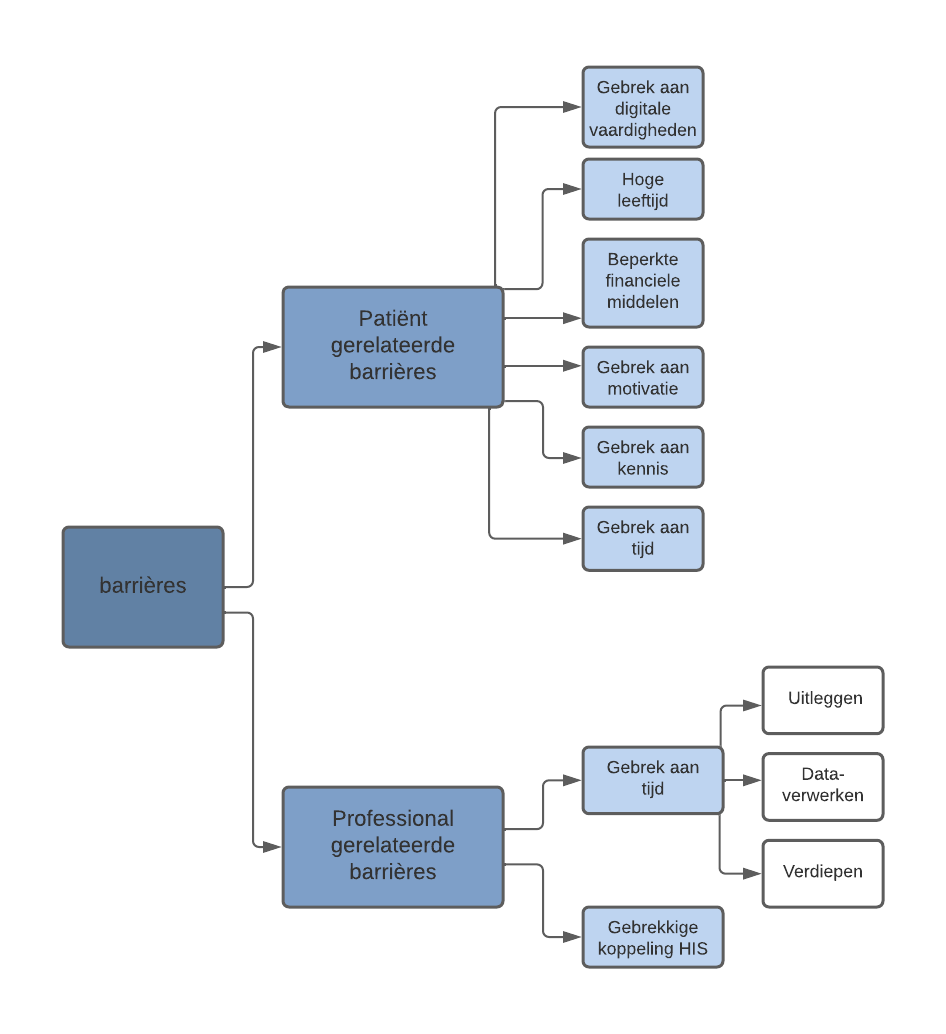


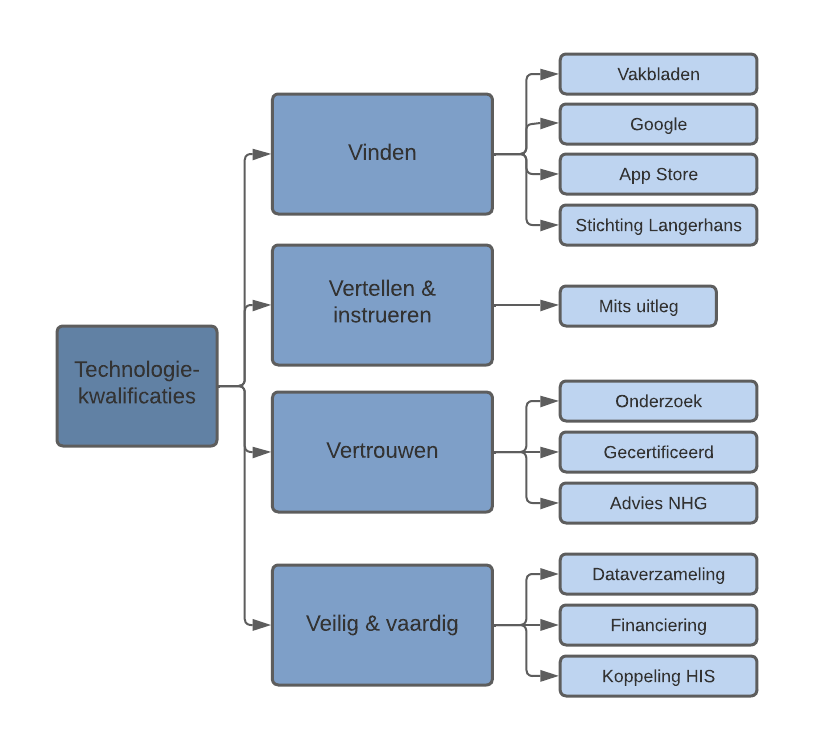

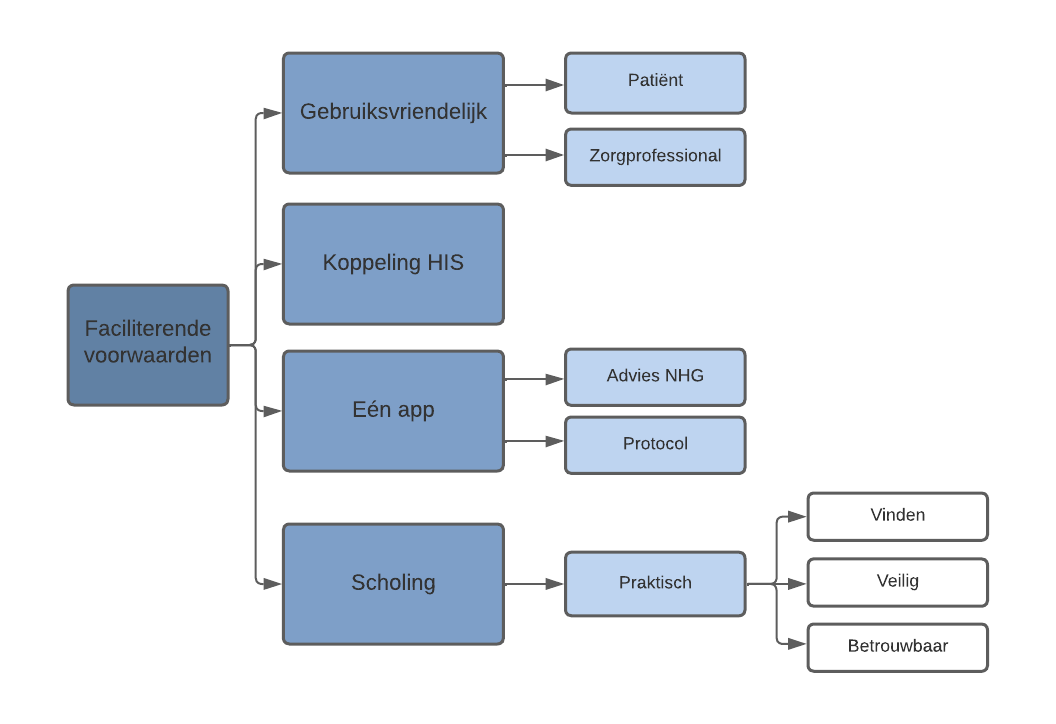


**Figuur 4**

*Codeboom faciliterende voorwaarden*

**Figuur 3**

*Codeboom technologiekwalificaties*
